# Supplementary material
Source: publisher figshare collection journal article supplement (https://sage.figshare.com/ndownloader/files/17682431)
Supplement: Supplementary file 1 [file 17682431]

**Informalized containment: food markets and the governance of the informal food sector in  
Windhoek, Namibia**

**Online supplementary information**

TABLE S1  
Open markets in Windhoek

|                           | <b>No. of stands</b> |
|---------------------------|----------------------|
| Soweto Market             | 199                  |
| Tukondjeni Market         | 140                  |
| Single Quarters Market    | 120                  |
| Wernhill Flea Market      | 96                   |
| Post Street Mall          | 82                   |
| Jonas Haiduwa Market      | 66                   |
| Eliazer Tuhadeleni Market | 56                   |
| Hakahana Market           | 39                   |
| Semi Mall                 | 30                   |
| Nangela Kaduuluma Market  | 26                   |
| Northern Industrial Area  | 25                   |
| Onghendambala Market      | 24                   |
| Green Well Market         | n/a                  |
| Khomasdal Market          | n/a                  |
| Okahandja Park            | n/a                  |
| Wanaheda Bus Stop         | n/a                  |

SOURCE: Nickanor, Ndeyapo, Lawrence Kazembe, Jonathan Crush and Jeremy Wagner (2017), “The supermarket revolution and food security in Namibia”, Urban Food Security Series 26, African Food Security Urban Network, Cape Town, 87 pages.

TABLE S2  
Open markets preferred by survey respondents

| <b>Name</b>               | <b>No.</b> | <b>%</b> |
|---------------------------|------------|----------|
| Tukondjeni Market         | 145        | 42.1     |
| Single Quarters Market    | 85         | 24.6     |
| Soweto Market             | 34         | 9.9      |
| Okahandja Park            | 29         | 8.4      |
| Hakahana Market           | 25         | 7.2      |
| Wanaheda Bus Stop         | 13         | 3.8      |
| Khomasdal Market          | 8          | 2.3      |
| Green Well Market         | 5          | 1.4      |
| Eliazer Tuhadeleni Market | 1          | 0.3      |
| Semi Mall                 | 0          | 0.0      |
| Nangela Kaduuluma Market  | 0          | 0.0      |
| Northern Industrial Area  | 0          | 0.0      |
| Onghendambala Market      | 0          | 0.0      |
| Wernhill Flea Market      | 0          | 0.0      |
| Post Street Mall          | 0          | 0.0      |
| Jonas Haiduwa Market      | 0          | 0.0      |
| Total                     | 345        | 100.0    |

TABLE S3  
Informal markets preferred by survey respondents

| <b>Name</b>                      | <b>No.</b> | <b>%</b> |
|----------------------------------|------------|----------|
| Havana Road End                  | 63         | 17.0     |
| Oshitenda Roadside               | 36         | 9.7      |
| Olyeeta Roadside                 | 35         | 9.5      |
| Monte Christo Roadside           | 30         | 8.1      |
| Goreangab                        | 29         | 7.8      |
| Otjomuise Road Bus Stop          | 24         | 6.5      |
| Havana Bus Stop                  | 23         | 6.2      |
| Ombili Woerman Roadside          | 21         | 5.7      |
| Greenwell Roadside               | 15         | 4.1      |
| Havana 3-Way                     | 12         | 3.2      |
| Gemeente Bus Stop                | 10         | 2.7      |
| Herero Mall                      | 10         | 2.7      |
| Okahandja Park Roadside Bus Stop | 9          | 2.4      |
| Single Quarter Roadside          | 7          | 1.9      |
| Goreangab Sport Field            | 7          | 1.9      |
| Havana Council office            | 1          | 0.3      |
| Wernhill                         | 1          | 0.3      |
| Black Chain                      | 1          | 0.3      |
| Total                            |            | 100.0    |
